# Supplementary material for: Protein markers and risk of type 2 diabetes and prediabetes: a targeted proteomics approach in the KORA F4/FF4 study
Source: Springer Nature journal article supplement (doi:10.1007/s10654-018-0475-8), 2018-12-31
Supplement: MOESM1 [file 16367124]

## *Online-Only Supplemental Material*

related to the Article

### **Protein markers and risk of type 2 diabetes and prediabetes: a targeted proteomics approach in the KORA F4/FF4 study**

Authors: Cornelia Huth<sup>1,2</sup>, Christine von Toerne, Florian Schederecker, Tonia de las Heras Gala, Christian Herder, Florian Kronenberg, Christa Meisinger, Wolfgang Rathmann, Wolfgang Koenig, Melanie Waldenberger, Michael Roden, Annette Peters, Stefanie M. Hauck, Barbara Thorand

<sup>1</sup>Institute of Epidemiology, Helmholtz Zentrum München – German Research Center for Environmental Health (GmbH), Neuherberg, Germany

<sup>2</sup>German Center for Diabetes Research (DZD), München-Neuherberg, Germany

Corresponding author:

Cornelia Huth, PhD, MSE, Dipl.oec.troph.

e-mail: [huth@helmholtz-muenchen.de](mailto:huth@helmholtz-muenchen.de)

**Targeted SRM-MS protein measurements** (*the description here in the Supplemental Material is complete and contains – in contrast to the description in the main article – some technical details which are not necessary to understand the article; the description here is intentionally partly redundant to the description in the main article*)

The plasma samples of 271 persons of the subcohort had already been measured previously (lot 1) [1]. The remaining subcohort and all additional incident cases were newly measured in 2016 when the FF4 data became available (lot 2,  $n=621$ ). These measurements were performed similarly as published for lot 1 [1] and are described together with the combined data preprocessing in detail below.

**Plasma depletion and on-bead digestions** The 621 lot 2 samples were randomly distributed into thirteen processing batches and quality control was performed as described for lot 1 [1]. All lot 2 sample preparation batches passed quality control. Depletion using ProteoMiner beads and tryptic digestion of lot 2 plasma were performed as previously described [1, 2] in the thirteen batches. After digestion, samples were stored at  $-80^{\circ}\text{C}$ .

**MS measurement and relative quantification** Selected peptides established in [1] were measured by mass spectrometry (MS) in a targeted selection reaction monitoring (SRM) approach. SRM-assays were created for 24 proteins, including one spike-in control protein as

described in [1]. Isotope-labelled synthetic (heavy) peptides were used for each peptide as internal control to correct signal integration and for relative quantification as described in [1]. The heavy peptide mix was added to the digested sample prior to MS measurement. Liquid chromatography MSMS analysis was performed on an Ultimate3000 HPLC system (Thermo Fischer Scientific, Dreieich, Germany) coupled online to a QTrap4000 (ABSCIEX, Framingham, MT, USA) mass spectrometer by a nanospray ion source, as previously described [1] with the following changes: Peptides were separated on a 60 min non-linear gradient of 5% acetonitrile in 0.1% formic acid to 40% at a flow rate of 300 nl/min and the interface heater temperature was set to 150 °C. The signals were quantified by calculation of the area under the curve (AUC) of pre-specified collision-induced peptide dissociation products, the so-called transitions using the software Skyline. All transitions were monitored (and manually corrected if necessary) for correct peak integration and for identical retention time of associated light and heavy signals.

**Relative quantification, normalization and quality control** Data preprocessing was performed using R version 3.4.2 [3]. Coefficients of variation (CV) of pooled samples were calculated for all transition signals based on five replicate measurements per lot using the software AuDIT [4]. Transitions with a CV  $\geq 30\%$  were excluded. A few measurements that were zero were randomly assigned a number between 1 and the minimum observation of the respective transition. Reduction from three to two transitions per peptide was performed as described [1]. Light (endogenous) to heavy (synthetic) ratios (LHRs) of the AUC-values were calculated,  $\log_2$ -transformed, and averaged for all transitions of each peptide. Peptide-level LHR information was averaged per protein to yield relative protein levels. Within this process, the data was corrected for the technical covariates lot and batch, instrument maintenance and cleaning routines, day of analysis, time on autosampler and spike-in control peptide measurement results. Quality control of signals was based on CV results of lot 1 and lot 2 pools and 29 duplicate measurements of lot 2 samples. Only peptides demonstrating reliable reproducibility were included in the combined analysis, leaving a total of 30 peptides in lot 1 and 31 peptides in lot 2, and representing 14 candidate proteins (Supplemental Table 1). The SRM-MS signals of all analyzed transitions are shown in Supplemental Fig. 2 exemplarily for a plasma sample pool. The work-flow from plasma depletion, via SRM-MS measurement, to computation of multivariable adjusted odds ratios (ORs) is illustrated in Supplemental Fig. 3.

## **GDRS adaptations**

In contrast to the originally published version [5, 6], the adapted version of the GDRS used in the present analysis did not include dietary information on meat, fiber and coffee consumption, because this data was unavailable in KORA F4. Additionally, smoking status was analyzed using three instead of the originally proposed five categories to avoid statistically instable results due to small number of participants in some categories, and the physical inactivity variable only included sports but not gardening and biking. Regarding parental history, we included the additional category ‘unknown’, which incorporates a higher type 2 diabetes risk, separately from the category ‘no parental history’ [7]. Although the latter more detailed assessment should individually result in a higher predictive performance, altogether the aforementioned necessary adaptations are likely to lead to a slightly lower predictive performance of the used GDRS<sub>adapted</sub> reference model compared to the originally proposed model.

## **Supplemental References**

1. von Toerne C, Huth C, de Las Heras Gala T, Kronenberg F, Herder C, Koenig W et al. MASP1, THBS1, GPLD1 and ApoA-IV are novel biomarkers associated with prediabetes: the KORA F4 study. *Diabetologia*. 2016;59:1882-92.
2. von Toerne C, Kahle M, Schafer A, Ispiryan R, Blindert M, Hrabe De Angelis M et al. Apoe, Mbl2, and Psp Plasma Protein Levels Correlate with Diabetic Phenotype in NZO Mice - An Optimized Rapid Workflow for SRM-Based Quantification. *J Proteome Res*. 2013;12:1331-43.
3. R Core Team. *R: A Language and Environment for Statistical Computing*. R Foundation for Statistical Computing; 2017.
4. Abbatiello SE, Mani DR, Keshishian H, Carr SA. Automated detection of inaccurate and imprecise transitions in peptide quantification by multiple reaction monitoring mass spectrometry. *Clin Chem*. 2010;56:291-305.
5. DiFe - Deutscher Diabetes-Risiko-Test (DRT). *Diabetologie und Stoffwechsel*. 2016;11:S204-S6.

6. Paprott R, Muhlenbruch K, Mensink GB, Thiele S, Schulze MB, Scheidt-Nave C et al. Validation of the German Diabetes Risk Score among the general adult population: findings from the German Health Interview and Examination Surveys. *BMJ Open Diabetes Res Care*. 2016;4:e000280.

7. Thorand B, Liese AD, Metzger MH, Reitmeir P, Schneider A, Lowel H. Can inaccuracy of reported parental history of diabetes explain the maternal transmission hypothesis for diabetes? *Int J Epidemiol*. 2001;30:1084-9.

## SUPPLEMENTAL TABLES

**Supplemental Table 1** Plasma proteins and their peptides, measured by SRM-MS and investigated for association with incident type 2 diabetes and incident prediabetes

| <b>Protein ID and Peptide sequence</b><br>[amino acid position]                                                                                | <b>Protein Symbol</b> | <b>Protein Name</b>                                       |
|------------------------------------------------------------------------------------------------------------------------------------------------|-----------------------|-----------------------------------------------------------|
| <b>ENSP00000320709</b><br>K.GDIGETGVPGAEGPR.G [77, 91]                                                                                         | ADIPOQ                | adiponectin                                               |
| <b>ENSP00000350425</b><br>K.SELTQQLNALFQDK.L [51, 64]<br>K.LGEVNTYAGDLQK.K [65, 77]<br>R.ISASAEELR.Q [255, 263]                                | apoA-IV               | apolipoprotein A-IV                                       |
| <b>ENSP00000466775</b><br>K.ESLSSYWESAK.T [41, 51]<br>K.TAAQNLYEK.T [52, 60]<br>K.TYLPVAVDEK.L [61, 69]                                        | apoC-II               | apolipoprotein C-II                                       |
| <b>ENSP00000227667</b><br>R.GWVTDGFSSLK.D [60, 70]                                                                                             | apoC-III              | apolipoprotein C-III                                      |
| <b>ENSP00000252486</b><br>K.SELEEQLTPVAEETR.A [93, 107]<br>R.AATVGLSLAGQPLQER.A [209, 223]<br>K.LEEQAQQIR.L [260, 268]                         | apoE                  | apolipoprotein E                                          |
| <b>ENSP00000357156</b><br>R.EATLQDCPSGPWGK.N [211, 224]<br>K.NTCNHDEDTWVECEDPFDLR.L [225, 244]<br>R.LVGGDNLCSGR.L [245, 255]                   | CD5L                  | CD5 molecule-like                                         |
| <b>ENSP00000255030</b><br>K.ESDTSYVSLK.A [31, 40]<br>R.GYSIFSYATK.R [65, 74]                                                                   | CRP                   | C-reactive protein,<br>pentraxin-related                  |
| <b>ENSP00000230036</b><br>R.IADVTSGLIGGEDGR.V [742, 756] <sup>a</sup><br>K.AQYVLISPEASSR.F [786, 798]<br>R.FGSSLITVR.S [799, 807] <sup>b</sup> | GPLD1                 | glycosylphosphatidylinositol<br>specific phospholipase D1 |
| <b>ENSP00000336792/ENSP00000296280</b><br>R.TGVITSPDFPNYPK.S [193, 207]<br>R.AAGNECPELQPPVHGK.I [295, 310]<br>R.SLPTCLPVCGLPK.F [427, 439]     | MASP                  | mannan-binding lectin serine<br>peptidase                 |
| <b>ENSP00000363079</b><br>K.WLTFSLGK.Q [124, 131] <sup>b</sup><br>K.FQASVATPR.N [157, 165] <sup>b</sup><br>R.NAAENGAIQNLIK.E [166, 178]        | MBL2                  | mannose-binding lectin<br>(protein C) 2, soluble          |

Supplemental Table 1 – *continued*

| <b>Protein ID and Peptide sequence<br/>[amino acid position]</b>                                                                               | <b>Protein<br/>Symbol</b> | <b>Protein<br/>Name</b>                                         |
|------------------------------------------------------------------------------------------------------------------------------------------------|---------------------------|-----------------------------------------------------------------|
| <b>ENSP00000261336</b><br>K.GSFALSFPVESDVAPIAR.M [517, 534]<br>K.TLLVEAEGIEQEK.T [907, 919]                                                    | PZP                       | pregnancy-zone protein                                          |
| <b>ENSP00000360519</b><br>K.YWGVASFLQK.G [107, 116] <sup>a</sup><br>R.LIVHNGYCDGR.S [184, 194]                                                 | RBP4                      | retinol binding protein 4, plasma                               |
| <b>ENSP00000369816</b><br>R.IALGGLLFPASNLR.L [169, 182]<br>K.QAEISASAPTSR.S [202, 214]                                                         | SHBG                      | sex hormone-binding globulin                                    |
| <b>ENSP00000260356</b><br>K.GGVNDNFQGVLQNVF.F [201, 215]<br>R.TIVTTLQDSIR.K [288, 298]                                                         | THBS1                     | thrombospondin 1                                                |
| <b>Control protein</b><br>K.TFQGPPHGIQVER.D [146, 158]<br>R.FLFCAEALYK.A [217, 226]<br>R.DITLGFVDLLR.D [339, 349]<br>R.VALEACVQAR.N [421, 430] | Rubisco                   | ribulose-1,5-bisphosphate<br>carboxylase oxygenase<br>(spinach) |

<sup>a</sup>Exclusively used in lot 1 data<sup>b</sup>Exclusively used in lot 2 data

**Supplemental Table 2** Multivariable adjusted logistic regression results for association between the 14 proteins (per one sex-specific SD increase) and incident type 2 diabetes as well as incident prediabetes.

| Protein<br>Adjustment | Incident Type 2 Diabetes<br>vs Non-Cases ( <i>n</i> =123 vs 660) |                       |                | Incident (Pre)diabetes <sup>a</sup><br>vs Non-Cases ( <i>n</i> =255 vs 446) |                |                |
|-----------------------|------------------------------------------------------------------|-----------------------|----------------|-----------------------------------------------------------------------------|----------------|----------------|
|                       | OR                                                               | 95% CI                | <i>p</i> value | OR                                                                          | 95% CI         | <i>p</i> value |
| adiponectin           |                                                                  |                       |                |                                                                             |                |                |
| Model 1               | <b>0.713</b>                                                     | <b>[0.570, 0.893]</b> | <b>0.003</b>   | 0.936                                                                       | [0.778, 1.127] | 0.486          |
| Model 2a              | <b>0.785</b>                                                     | <b>[0.617, 0.999]</b> | <b>0.049</b>   | 0.994                                                                       | [0.820, 1.205] | 0.951          |
| Model 2b              | 0.843                                                            | [0.652, 1.090]        | 0.193          | 1.043                                                                       | [0.854, 1.273] | 0.682          |
| Model 3a              | <b>0.709</b>                                                     | <b>[0.561, 0.894]</b> | <b>0.004</b>   | 0.996                                                                       | [0.824, 1.205] | 0.970          |
| Model 3b              | <b>0.773</b>                                                     | <b>[0.605, 0.986]</b> | <b>0.038</b>   | 1.052                                                                       | [0.863, 1.282] | 0.614          |
| apoA-IV               |                                                                  |                       |                |                                                                             |                |                |
| Model 1               | 1.056                                                            | [0.851, 1.311]        | 0.621          | 1.064                                                                       | [0.892, 1.268] | 0.490          |
| Model 2a              | 1.099                                                            | [0.882, 1.369]        | 0.400          | 1.064                                                                       | [0.890, 1.270] | 0.497          |
| Model 2b              | 1.016                                                            | [0.802, 1.288]        | 0.892          | 0.986                                                                       | [0.821, 1.185] | 0.885          |
| Model 3a              | 1.077                                                            | [0.861, 1.347]        | 0.514          | 1.043                                                                       | [0.870, 1.250] | 0.647          |
| Model 3b              | 0.994                                                            | [0.782, 1.263]        | 0.960          | 0.973                                                                       | [0.808, 1.172] | 0.773          |
| apoC-II               |                                                                  |                       |                |                                                                             |                |                |
| Model 1               | <b>1.279</b>                                                     | <b>[1.029, 1.591]</b> | <b>0.027</b>   | 1.064                                                                       | [0.895, 1.264] | 0.484          |
| Model 2a              | 1.092                                                            | [0.847, 1.407]        | 0.499          | 1.037                                                                       | [0.843, 1.274] | 0.733          |
| Model 2b              | 1.113                                                            | [0.845, 1.466]        | 0.447          | 1.021                                                                       | [0.825, 1.262] | 0.851          |
| Model 3a              | <b>1.309</b>                                                     | <b>[1.046, 1.637]</b> | <b>0.018</b>   | 1.037                                                                       | [0.867, 1.240] | 0.688          |
| Model 3b              | <b>1.288</b>                                                     | <b>[1.009, 1.643]</b> | <b>0.042</b>   | 1.009                                                                       | [0.838, 1.214] | 0.928          |
| apoC-III              |                                                                  |                       |                |                                                                             |                |                |
| Model 1               | <b>1.302</b>                                                     | <b>[1.009, 1.681]</b> | <b>0.042</b>   | 1.041                                                                       | [0.854, 1.269] | 0.691          |
| Model 2a              | 1.048                                                            | [0.759, 1.448]        | 0.775          | 1.002                                                                       | [0.781, 1.284] | 0.990          |
| Model 2b              | 1.110                                                            | [0.784, 1.571]        | 0.556          | 0.976                                                                       | [0.755, 1.263] | 0.855          |
| Model 3a              | <b>1.376</b>                                                     | <b>[1.056, 1.794]</b> | <b>0.018</b>   | 1.028                                                                       | [0.838, 1.262] | 0.791          |
| Model 3b              | <b>1.364</b>                                                     | <b>[1.026, 1.812]</b> | <b>0.032</b>   | 0.998                                                                       | [0.805, 1.236] | 0.983          |
| apoE                  |                                                                  |                       |                |                                                                             |                |                |
| Model 1               | <b>1.318</b>                                                     | <b>[1.093, 1.589]</b> | <b>0.004</b>   | 1.131                                                                       | [0.974, 1.315] | 0.107          |
| Model 2a              | 1.187                                                            | [0.968, 1.455]        | 0.099          | 1.107                                                                       | [0.944, 1.298] | 0.213          |
| Model 2b              | <b>1.267</b>                                                     | <b>[1.013, 1.583]</b> | <b>0.038</b>   | 1.126                                                                       | [0.956, 1.326] | 0.156          |
| Model 3a              | <b>1.329</b>                                                     | <b>[1.095, 1.612]</b> | <b>0.004</b>   | 1.094                                                                       | [0.936, 1.279] | 0.257          |
| Model 3b              | <b>1.376</b>                                                     | <b>[1.112, 1.702]</b> | <b>0.003</b>   | 1.103                                                                       | [0.938, 1.297] | 0.235          |
| CD5L                  |                                                                  |                       |                |                                                                             |                |                |
| Model 1               | 1.070                                                            | [0.862, 1.329]        | 0.539          | 1.048                                                                       | [0.882, 1.245] | 0.592          |
| Model 2a              | 1.054                                                            | [0.842, 1.318]        | 0.647          | 1.084                                                                       | [0.908, 1.294] | 0.371          |
| Model 2b              | 1.171                                                            | [0.917, 1.497]        | 0.206          | 1.133                                                                       | [0.943, 1.361] | 0.183          |
| Model 3a              | 1.066                                                            | [0.854, 1.330]        | 0.573          | 1.089                                                                       | [0.910, 1.303] | 0.352          |
| Model 3b              | 1.171                                                            | [0.918, 1.494]        | 0.203          | 1.132                                                                       | [0.940, 1.363] | 0.192          |

Supplemental Table 2 – *continued*

| Protein<br>Adjustment | Incident Type 2 Diabetes<br>vs Non-Cases ( <i>n</i> =123 vs 660) |                       |                | Incident (Pre)diabetes <sup>a</sup><br>vs Non-Cases ( <i>n</i> =255 vs 446) |                       |                |
|-----------------------|------------------------------------------------------------------|-----------------------|----------------|-----------------------------------------------------------------------------|-----------------------|----------------|
|                       | OR                                                               | 95% CI                | <i>p</i> value | OR                                                                          | 95% CI                | <i>p</i> value |
| <b>CRP</b>            |                                                                  |                       |                |                                                                             |                       |                |
| Model 1               | 1.142                                                            | [0.913, 1.428]        | 0.244          | 1.117                                                                       | [0.934, 1.336]        | 0.224          |
| Model 2a              | 1.114                                                            | [0.881, 1.409]        | 0.366          | 1.069                                                                       | [0.889, 1.285]        | 0.479          |
| Model 2b              | 1.040                                                            | [0.808, 1.339]        | 0.760          | 1.097                                                                       | [0.907, 1.327]        | 0.342          |
| Model 3a              | 1.161                                                            | [0.919, 1.465]        | 0.210          | 1.105                                                                       | [0.916, 1.333]        | 0.296          |
| Model 3b              | 1.067                                                            | [0.830, 1.372]        | 0.612          | 1.129                                                                       | [0.930, 1.369]        | 0.219          |
| <b>GPLD1</b>          |                                                                  |                       |                |                                                                             |                       |                |
| Model 1               | 1.156                                                            | [0.917, 1.457]        | 0.221          | 1.114                                                                       | [0.927, 1.339]        | 0.251          |
| Model 2a              | 1.128                                                            | [0.888, 1.432]        | 0.324          | 1.126                                                                       | [0.930, 1.362]        | 0.223          |
| Model 2b              | 1.164                                                            | [0.910, 1.489]        | 0.228          | 1.116                                                                       | [0.920, 1.355]        | 0.266          |
| Model 3a              | 1.182                                                            | [0.932, 1.499]        | 0.169          | 1.127                                                                       | [0.930, 1.366]        | 0.222          |
| Model 3b              | 1.206                                                            | [0.942, 1.542]        | 0.137          | 1.111                                                                       | [0.914, 1.352]        | 0.290          |
| <b>MASP</b>           |                                                                  |                       |                |                                                                             |                       |                |
| Model 1               | <b>1.358</b>                                                     | <b>[1.100, 1.677]</b> | <b>0.004</b>   | <b>1.232</b>                                                                | <b>[1.033, 1.470]</b> | <b>0.020</b>   |
| Model 2a              | <b>1.306</b>                                                     | <b>[1.052, 1.621]</b> | <b>0.016</b>   | <b>1.241</b>                                                                | <b>[1.036, 1.486]</b> | <b>0.019</b>   |
| Model 2b              | <b>1.274</b>                                                     | <b>[1.013, 1.601]</b> | <b>0.038</b>   | <b>1.284</b>                                                                | <b>[1.063, 1.551]</b> | <b>0.009</b>   |
| Model 3a              | <b>1.375</b>                                                     | <b>[1.112, 1.702]</b> | <b>0.003</b>   | <b>1.239</b>                                                                | <b>[1.031, 1.490]</b> | <b>0.022</b>   |
| Model 3b              | <b>1.341</b>                                                     | <b>[1.068, 1.683]</b> | <b>0.011</b>   | <b>1.277</b>                                                                | <b>[1.053, 1.549]</b> | <b>0.013</b>   |
| <b>MBL2</b>           |                                                                  |                       |                |                                                                             |                       |                |
| Model 1               | 1.075                                                            | [0.814, 1.421]        | 0.609          | 0.997                                                                       | [0.804, 1.237]        | 0.981          |
| Model 2a              | 1.069                                                            | [0.804, 1.420]        | 0.646          | 0.969                                                                       | [0.780, 1.205]        | 0.778          |
| Model 2b              | 1.122                                                            | [0.818, 1.539]        | 0.475          | 0.967                                                                       | [0.769, 1.214]        | 0.770          |
| Model 3a              | 1.052                                                            | [0.793, 1.396]        | 0.727          | 0.964                                                                       | [0.771, 1.205]        | 0.747          |
| Model 3b              | 1.094                                                            | [0.802, 1.493]        | 0.569          | 0.965                                                                       | [0.763, 1.220]        | 0.765          |
| <b>PZP</b>            |                                                                  |                       |                |                                                                             |                       |                |
| Model 1               | 0.879                                                            | [0.734, 1.053]        | 0.161          | 1.049                                                                       | [0.906, 1.213]        | 0.522          |
| Model 2a              | 0.895                                                            | [0.744, 1.076]        | 0.237          | 1.038                                                                       | [0.895, 1.204]        | 0.622          |
| Model 2b              | 0.863                                                            | [0.706, 1.054]        | 0.149          | 1.040                                                                       | [0.892, 1.213]        | 0.613          |
| Model 3a              | 0.878                                                            | [0.731, 1.056]        | 0.167          | 1.062                                                                       | [0.914, 1.235]        | 0.429          |
| Model 3b              | 0.841                                                            | [0.689, 1.027]        | 0.089          | 1.064                                                                       | [0.910, 1.245]        | 0.436          |
| <b>RBP4</b>           |                                                                  |                       |                |                                                                             |                       |                |
| Model 1               | 1.173                                                            | [0.944, 1.457]        | 0.150          | 0.933                                                                       | [0.787, 1.106]        | 0.427          |
| Model 2a              | 1.072                                                            | [0.853, 1.348]        | 0.551          | 0.939                                                                       | [0.785, 1.123]        | 0.489          |
| Model 2b              | 1.032                                                            | [0.802, 1.327]        | 0.809          | 0.958                                                                       | [0.796, 1.152]        | 0.648          |
| Model 3a              | 1.159                                                            | [0.930, 1.443]        | 0.188          | 0.969                                                                       | [0.813, 1.155]        | 0.729          |
| Model 3b              | 1.124                                                            | [0.882, 1.433]        | 0.344          | 0.983                                                                       | [0.820, 1.178]        | 0.850          |
| <b>SHBG</b>           |                                                                  |                       |                |                                                                             |                       |                |
| Model 1               | 0.863                                                            | [0.723, 1.031]        | 0.105          | 0.988                                                                       | [0.852, 1.144]        | 0.867          |
| Model 2a              | 0.958                                                            | [0.792, 1.158]        | 0.656          | 0.991                                                                       | [0.851, 1.155]        | 0.911          |
| Model 2b              | 1.146                                                            | [0.928, 1.416]        | 0.204          | 1.040                                                                       | [0.889, 1.216]        | 0.624          |
| Model 3a              | 0.875                                                            | [0.728, 1.052]        | 0.155          | 0.943                                                                       | [0.808, 1.099]        | 0.450          |
| Model 3b              | 1.043                                                            | [0.853, 1.276]        | 0.681          | 0.991                                                                       | [0.846, 1.161]        | 0.910          |



Supplemental Table 2 *continued*

| Protein<br>Adjustment | Incident Type 2 Diabetes<br>vs Non-Cases ( <i>n</i> =123 vs 660) |                |                | Incident (Pre)diabetes <sup>a</sup><br>vs Non-Cases ( <i>n</i> =255 vs 446) |                |                |
|-----------------------|------------------------------------------------------------------|----------------|----------------|-----------------------------------------------------------------------------|----------------|----------------|
|                       | OR                                                               | 95% CI         | <i>p</i> value | OR                                                                          | 95% CI         | <i>p</i> value |
| <b>THBS1</b>          |                                                                  |                |                |                                                                             |                |                |
| Model 1               | 1.010                                                            | [0.810, 1.259] | 0.931          | 1.039                                                                       | [0.865, 1.247] | 0.685          |
| Model 2a              | 1.015                                                            | [0.809, 1.274] | 0.897          | 1.016                                                                       | [0.843, 1.223] | 0.870          |
| Model 2b              | 0.966                                                            | [0.760, 1.226] | 0.774          | 0.997                                                                       | [0.823, 1.208] | 0.977          |
| Model 3a              | 1.035                                                            | [0.825, 1.299] | 0.765          | 1.011                                                                       | [0.836, 1.223] | 0.912          |
| Model 3b              | 0.980                                                            | [0.772, 1.245] | 0.870          | 0.991                                                                       | [0.815, 1.205] | 0.924          |

Statistically significant results are printed in bold.

Model 1: adjusted for age, sex, waist, height

Model 2a: adjusted for age, sex, waist circumference, height, smoking, physical inactivity, actual hypertension, triglyceride level, total cholesterol/HDL-cholesterol ratio

Model 2b: adjusted for model 2a covariates + HbA1c

Model 3a: adjusted for age, sex, waist circumference, height, smoking, physical inactivity, actual hypertension, parental history of diabetes, sibling history of diabetes

Model 3b: adjusted for model 3a covariates + HbA1c

<sup>a</sup>The outcome ‘incident (pre)diabetes’ includes 32 incident type 2 diabetes cases who converted directly from normoglycemia to type 2 diabetes

**Supplemental Table 3** Sensitivity analysis: Multivariable adjusted logistic regression results for association between the 14 proteins (per one sex-specific SD increase) and incident prediabetes after exclusion of the 32 incident type 2 diabetic participants

| Protein<br>Adjustment | Incident Prediabetes<br>vs Non-Cases ( <i>n</i> =223 vs 446) |                       |                |
|-----------------------|--------------------------------------------------------------|-----------------------|----------------|
|                       | OR                                                           | 95% CI                | <i>p</i> value |
| adiponectin           |                                                              |                       |                |
| Model 1               | 0.973                                                        | [0.803, 1.180]        | 0.784          |
| Model 2a              | 1.051                                                        | [0.859, 1.286]        | 0.629          |
| apoA-IV               |                                                              |                       |                |
| Model 1               | 1.065                                                        | [0.886, 1.279]        | 0.504          |
| Model 2a              | 1.061                                                        | [0.881, 1.277]        | 0.534          |
| apoC-II               |                                                              |                       |                |
| Model 1               | 1.082                                                        | [0.905, 1.294]        | 0.385          |
| Model 2a              | 1.062                                                        | [0.858, 1.314]        | 0.580          |
| apoC-III              |                                                              |                       |                |
| Model 1               | 1.056                                                        | [0.861, 1.294]        | 0.603          |
| Model 2a              | 1.027                                                        | [0.797, 1.325]        | 0.836          |
| apoE                  |                                                              |                       |                |
| Model 1               | 1.146                                                        | [0.981, 1.338]        | 0.086          |
| Model 2a              | 1.128                                                        | [0.955, 1.332]        | 0.155          |
| CD5L                  |                                                              |                       |                |
| Model 1               | 1.037                                                        | [0.867, 1.241]        | 0.691          |
| Model 2a              | 1.067                                                        | [0.888, 1.283]        | 0.488          |
| CRP                   |                                                              |                       |                |
| Model 1               | 1.149                                                        | [0.955, 1.383]        | 0.142          |
| Model 2a              | 1.099                                                        | [0.908, 1.330]        | 0.332          |
| GPLD1                 |                                                              |                       |                |
| Model 1               | 1.087                                                        | [0.900, 1.313]        | 0.388          |
| Model 2a              | 1.101                                                        | [0.905, 1.340]        | 0.336          |
| MASP                  |                                                              |                       |                |
| Model 1               | <b>1.241</b>                                                 | <b>[1.034, 1.488]</b> | <b>0.020</b>   |
| Model 2a              | <b>1.248</b>                                                 | <b>[1.036, 1.503]</b> | <b>0.020</b>   |
| MBL2                  |                                                              |                       |                |
| Model 1               | 1.013                                                        | [0.810, 1.267]        | 0.907          |
| Model 2a              | 0.982                                                        | [0.784, 1.231]        | 0.876          |
| PZP                   |                                                              |                       |                |
| Model 1               | 1.072                                                        | [0.923, 1.245]        | 0.361          |
| Model 2a              | 1.054                                                        | [0.905, 1.227]        | 0.499          |
| RBP4                  |                                                              |                       |                |
| Model 1               | 0.923                                                        | [0.775, 1.100]        | 0.372          |
| Model 2a              | 0.930                                                        | [0.774, 1.118]        | 0.439          |
| SHBG                  |                                                              |                       |                |
| Model 1               | 0.975                                                        | [0.837, 1.135]        | 0.745          |
| Model 2a              | 0.977                                                        | [0.834, 1.144]        | 0.775          |

Supplemental Table 3 *continued*

| Protein<br>Adjustment | Incident Prediabetes<br>vs Non-Cases ( <i>n</i> =223 vs 446) |                |                |
|-----------------------|--------------------------------------------------------------|----------------|----------------|
|                       | OR                                                           | 95% CI         | <i>p</i> value |
| <b>THBS1</b>          |                                                              |                |                |
| Model 1               | 1.044                                                        | [0.865, 1.260] | 0.654          |
| Model 2a              | 1.018                                                        | [0.840, 1.233] | 0.858          |

Statistically significant results are printed in bold.

Model 1: adjusted for age, sex, waist, height

Model 2a: adjusted for age, sex, waist circumference, height, smoking, physical inactivity, actual hypertension, triglyceride level, total cholesterol/HDL-cholesterol ratio

**Supplemental Table 4** AUC-estimates for study data as it is (not using bootstrap-validation) of selected proteins for incident type 2 diabetes and incident (pre)diabetes

| Basic Prediction Model                       | Selected Proteins            | Incident Type 2 Diabetes ( <i>n</i> =783) |                       |              |                            | Incident (Pre)diabetes ( <i>n</i> =701) |                      |                       |           |                            |
|----------------------------------------------|------------------------------|-------------------------------------------|-----------------------|--------------|----------------------------|-----------------------------------------|----------------------|-----------------------|-----------|----------------------------|
|                                              |                              | Basic AUC (95% CI)                        | Extended AUC (95% CI) | Delta AUC    | <i>p</i> value DeLong-Test | Selected Proteins                       | Basic AUC (95% CI)   | Extended AUC (95% CI) | Delta AUC | <i>p</i> value DeLong-Test |
| GDRS <sub>adapted</sub> <sup>a</sup>         | MASP, adiponectin, apoE      | 0.790 (0.751, 0.829)                      | 0.818 (0.780, 0.856)  | <b>0.028</b> | <b>0.011</b>               | MASP                                    | 0.752 (0.716, 0.788) | 0.756 (0.720, 0.791)  | 0.004     | 0.367                      |
| Age + sex + HbA1c                            | MASP, adiponectin, apoE      | 0.821 (0.780, 0.862)                      | 0.841 (0.802, 0.879)  | <b>0.019</b> | <b>0.010</b>               | MASP, CRP                               | 0.726 (0.687, 0.764) | 0.743 (0.706, 0.780)  | 0.017     | 0.062                      |
| GDRS <sub>adapted</sub> + HbA1c <sup>b</sup> | MASP, adiponectin, apoE, PZP | 0.850 (0.815, 0.886)                      | 0.860 (0.825, 0.896)  | 0.010        | 0.123                      | MASP                                    | 0.781 (0.747, 0.816) | 0.786 (0.752, 0.820)  | 0.004     | 0.299                      |

AUC = area under the receiver operating characteristic curve: Basic AUC without proteins, Extended AUC with selected proteins.

Statistically significant results are printed in bold.

<sup>a</sup>Model 3a: GDRS<sub>adapted</sub> prediction variables: age, sex, waist circumference, height, smoking, physical inactivity, actual hypertension, parental history of diabetes, sibling history of diabetes

<sup>b</sup>Model 3b

## SUPPLEMENTAL FIGURE

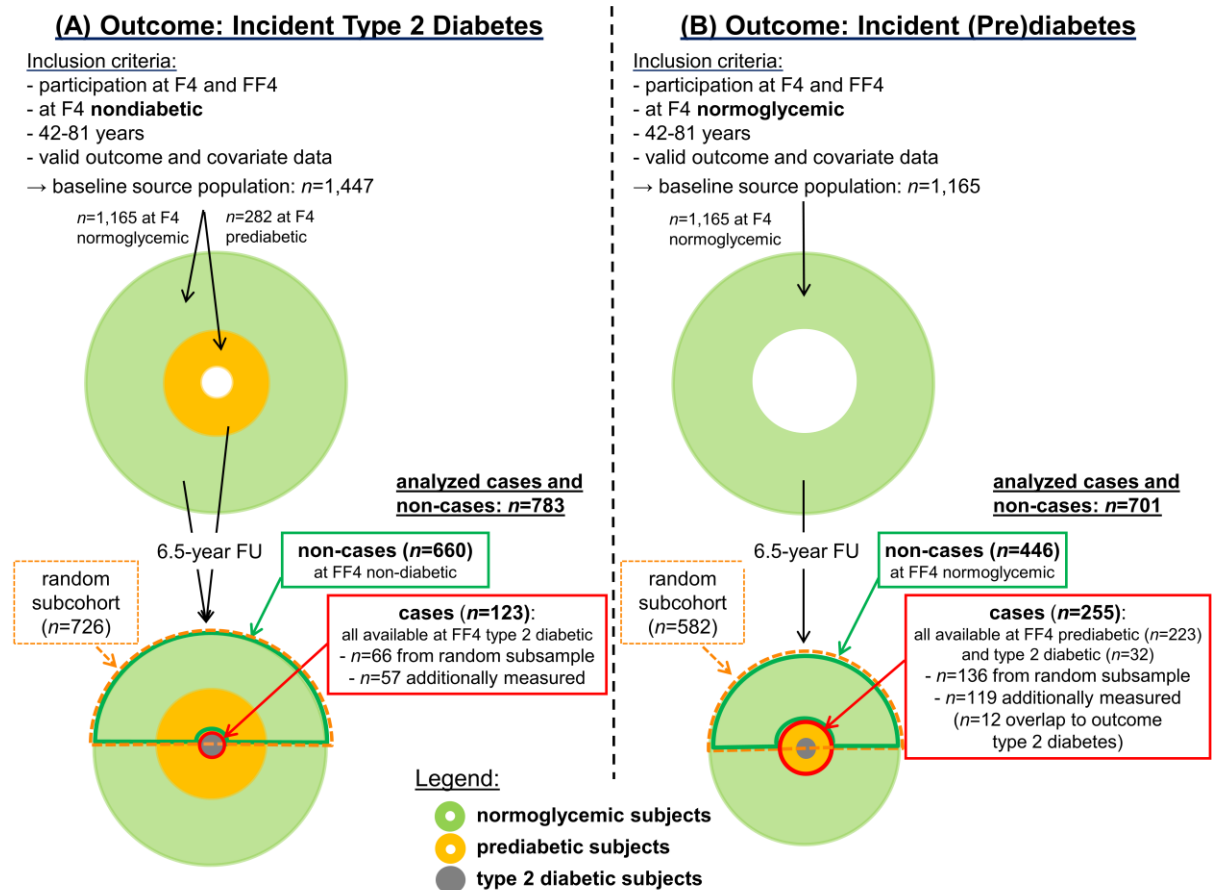

**Supplemental Fig. 1** Illustration of the case-cohort design for (A) incident type 2 diabetes (left part of the figure) and (B) incident (pre)diabetes (right part of the figure). The sample sizes of the baseline source population and the analyzed participants are presented in detail.

(A): At KORA FF4 incident type 2 diabetic cases and non-cases were at KORA F4 nondiabetic (normoglycemic or prediabetic). Plasma KORA F4 samples were measured.

(B): At KORA FF4 incident (pre)diabetic cases and non-cases were at KORA F4 normoglycemic. Plasma KORA F4 samples were measured.

**adiponectin** Peptide GDIGETGVPGAEGPR

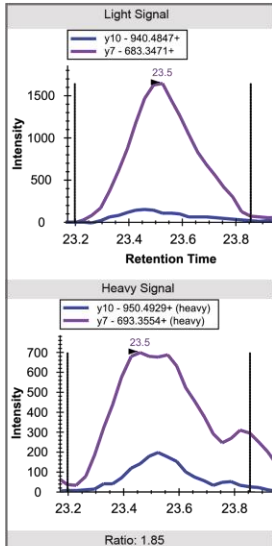

**apoA-IV** Peptide SELTQQLNALFQDK

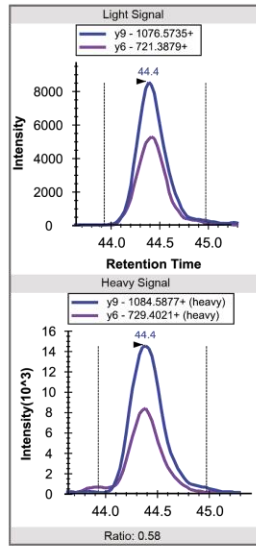

Peptide LGEVNTYAGDLQK

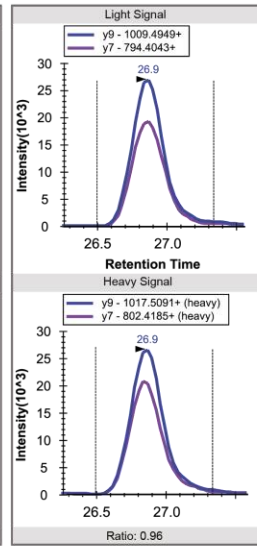

Peptide ISASAEELR

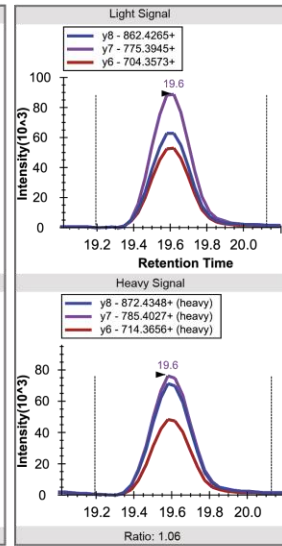

**apoC-II** Peptide ESLSSYWEKAK

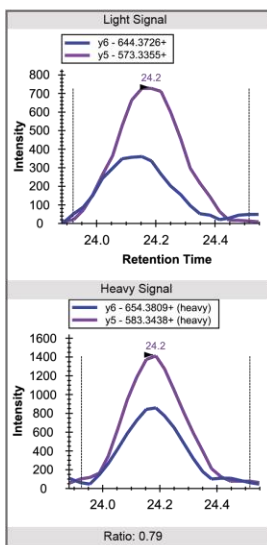

Peptide TAAQLNLEK

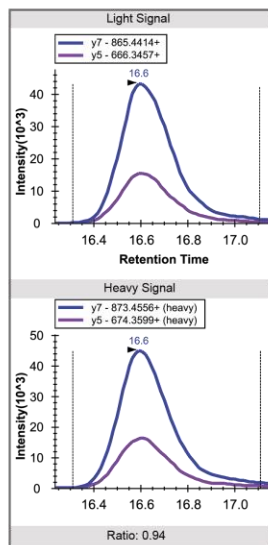

Peptide TYLPAVDEK

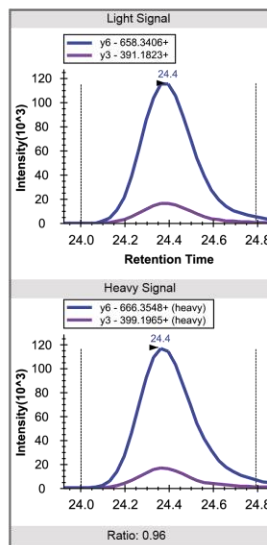

**apoC-III** Peptide DALSSVQESQVAQAR

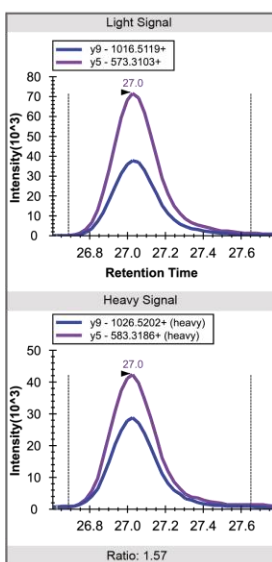

Peptide GWVTDGFSSLK

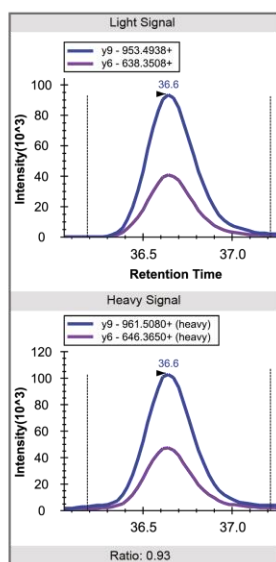

**apoE** Peptide SELEEQLTPVAEETR

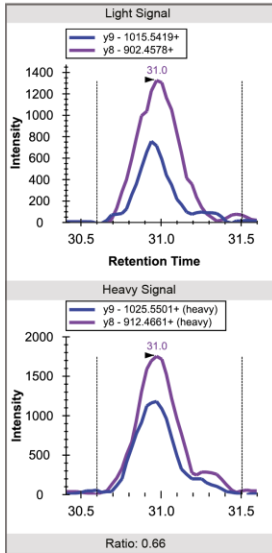

Peptide AATVGSGLAGQLQER

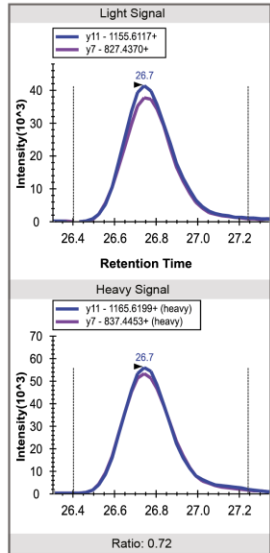

Peptide LEEQAQQR

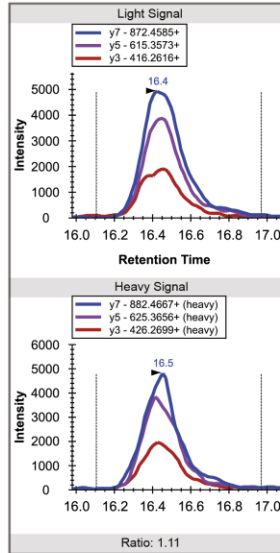

**CRP** Peptide ESDTSYVSLK

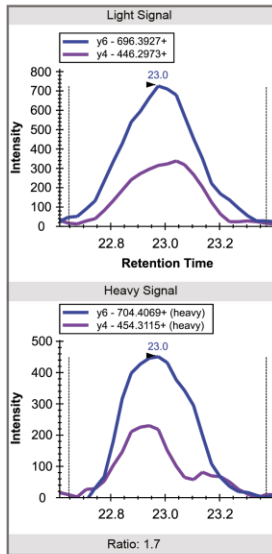

Peptide GYSIFSATK

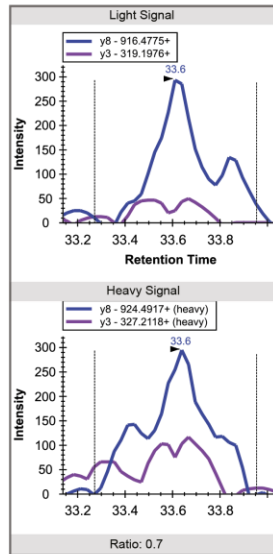

**CD5L** Peptide EATLQDCPSGPWGK

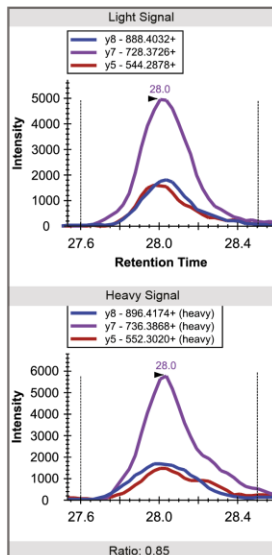

Peptide NTCNHEDTWECEDPFLDR

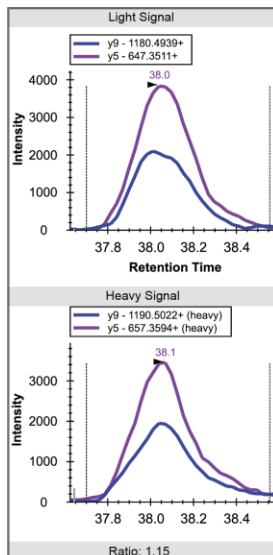

Peptide LVGGDNLCSGR

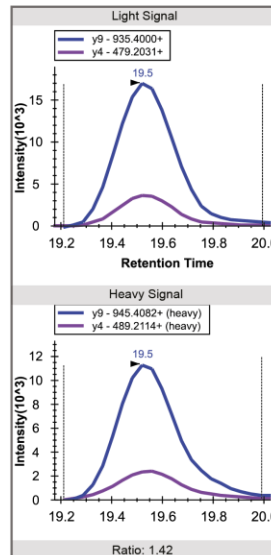

**GPLD1** Peptide IADVTSLGIGGEDGR

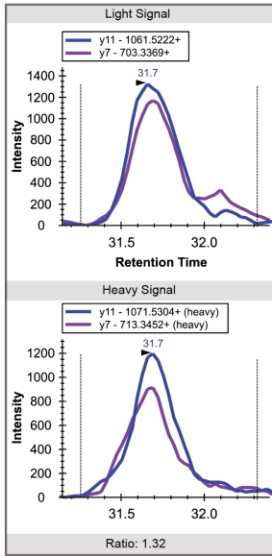

Peptide AQYVLISPEASSR

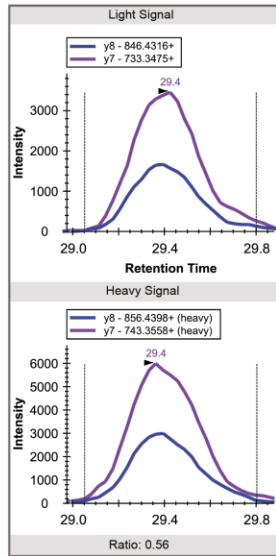

Peptide FGSSLITVR

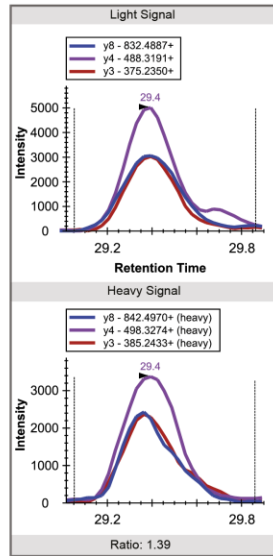

**MASP** Peptide TGVITSPDFNPYPK

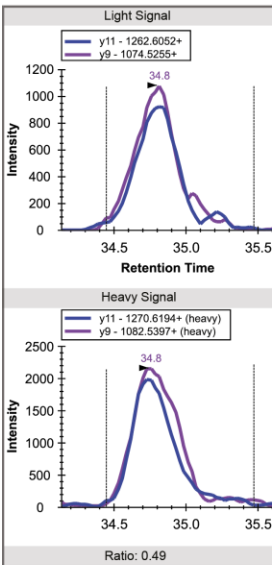

Peptide AAGNECPQLQPPVHGK

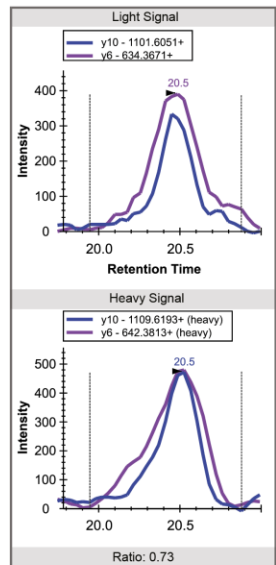

Peptide SLPTCLPVCGLPK

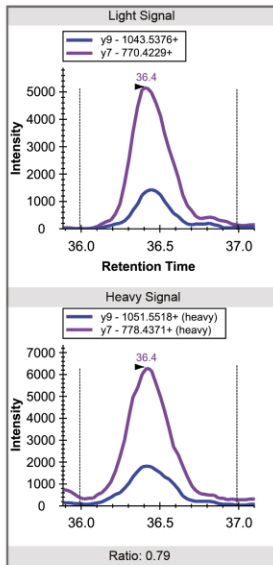

**MBL2** Peptide WLTFSLGK

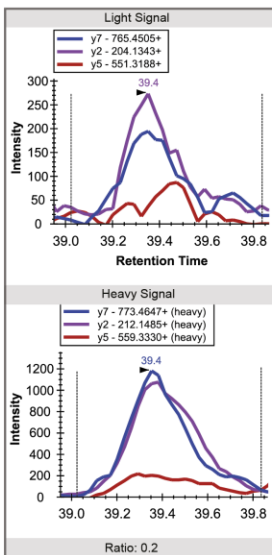

Peptide FQASVATPR

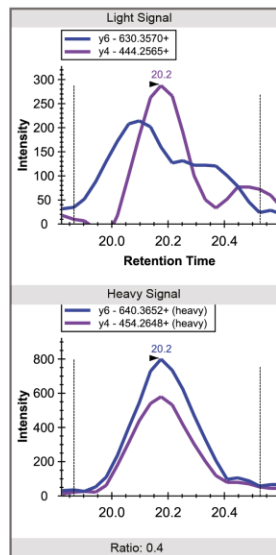

Peptide NAAENGAIQNLK

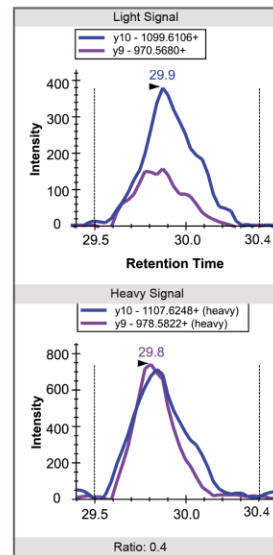



**PZP** Peptide TLLVEAEGIEQEK

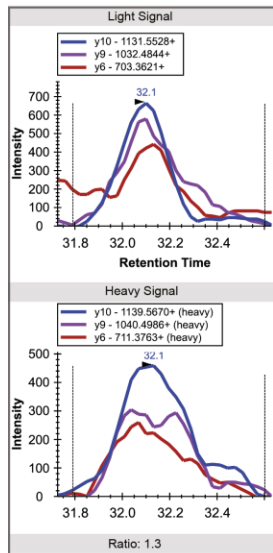

**RBP4** Peptide YWGVASFLQK

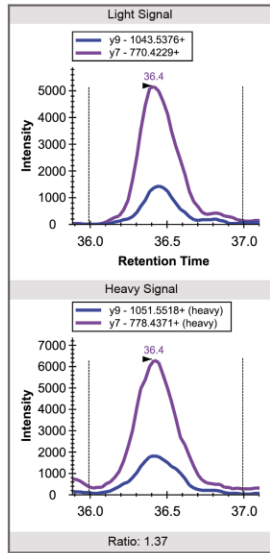

Peptide LIVHNGYCDGR

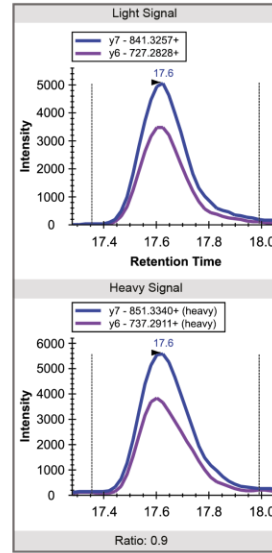

**SHBG** Peptide IALGGLLPASNLR

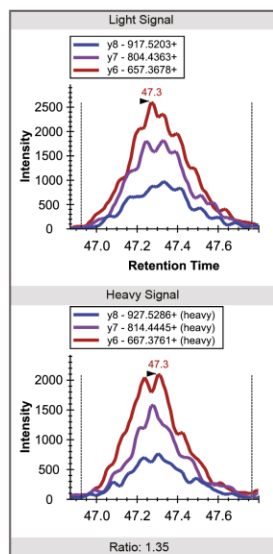

Peptide QAEISASAPTSLR

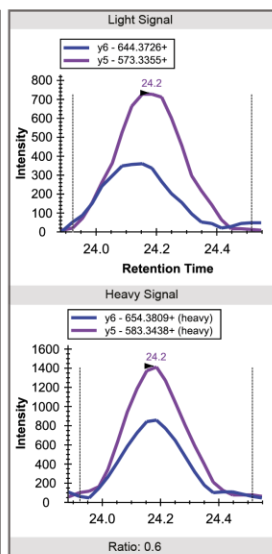

**THBS1** Peptide GGVNDNFQGLQNVR

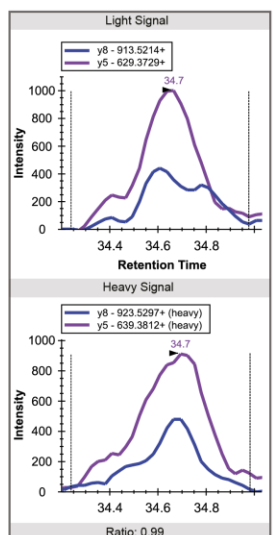

Peptide TIVTTLQDSIR

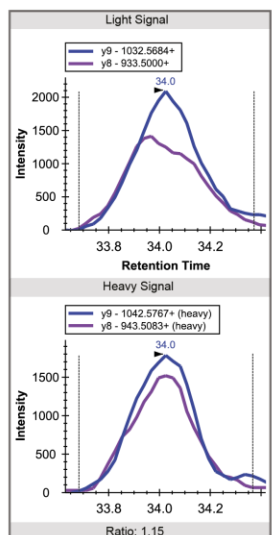

**Supplemental Fig. 2** This multipanel figure displays endogenous (light) and synthetic (heavy) transitions for the 31 peptides which represent the 14 proteins quantified in this study. For example, the y10 and y7 transitions were used for quantification of the adiponectin peptide GDIGETGVPGAEGPR. Because the figure shows all used transitions, three transitions are shown in case different transitions were used in lot 1 and lot 2 measurements (e.g. for the apoA-IV peptide ISASAEELR). The actual mass-to-charge ( $m/z$ ) values measured by the mass spectrometer for each transition are displayed in the small boxes above the transition curves. For example, for adiponectin the  $m/z$  value of the endogenous peptide's y10 transition is 940.4847. The  $m/z$  values of the heavy transitions are about 8 or 10 units higher compared to the light transitions, dependent on the heavy isotopes used in the purchased heavy peptides. For example, for adiponectin the  $m/z$  value of the y10 transition of the heavy peptide is 950.4929. The displayed data originate from a pooled sample used for quality control. The x-axis displays the retention time, which confirms matching of light and heavy signals. The y-axis displays an arbitrary intensity used for relative quantification. This intensity is peptide dependent and can only be compared between samples, not across peptides. The transition signals are quantified by calculation of the area under the curve (AUC), using the software Skyline. The heavy peptides were spiked in to generate light to heavy AUC ratios of roughly 1. On this basis, quantification is most exact. The ratios (displayed at the bottom of each transition panel) vary from 1 due to technical reasons. The subsequent computations yielding relative protein concentrations are depicted in suppl. fig. 3.

**Depletion and digestion**  
of KORA F4 plasma

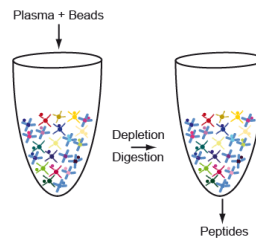

**SRM-MS measurement**  
31 peptides representing  
14 candidate proteins

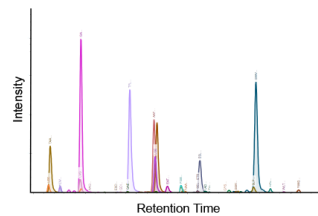

**SRM-MS signal integration**  
of all light and heavy  
transitions of all peptides

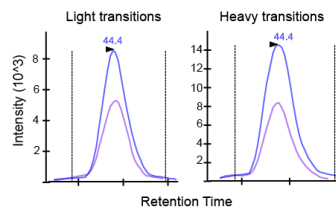

**Computation of sex standardized relative protein concentrations**

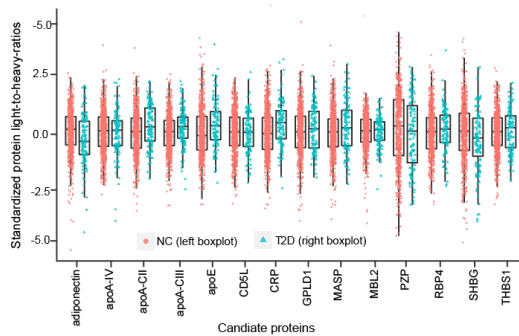

**Computation of age- and sex-adjusted odds ratios for incident T2D per 1 SD increased protein level**

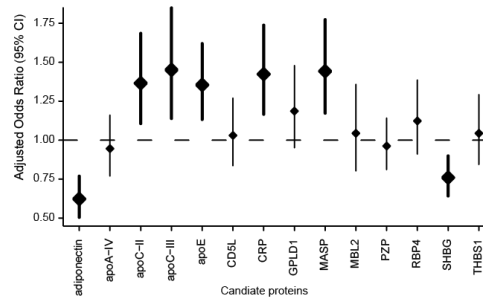

**Computation of multivariable adjusted odds ratios for incident T2D per 1 SD increased protein level**

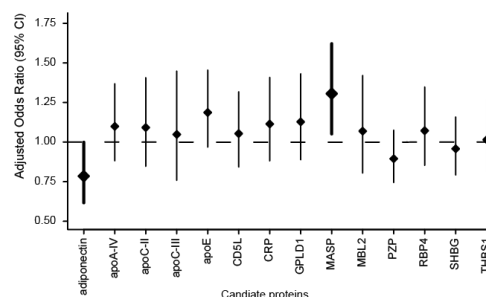

**Supplemental Fig. 3** This schematic workflow displays the major SRM-MS data analysis steps, described in detail in the methods subchapters ‘targeted SRM-MS protein measurements’ and ‘statistical analysis’. After sample preparation and mass spectrometric measurement, the signal intensities of all selected transitions of all used endogenous (light) and synthetic (heavy) peptides are recorded and quantified with the Skyline software. The transition signals of all investigated peptides are displayed in suppl. fig. 2. Panel 3 of this figure shows the signal intensities of one pooled sample exemplarily for one peptide and separately for the light and heavy transitions. The area under the curve (AUC) information from up to three transitions per peptide were exported from the Skyline software to R. Only the two transitions having the most similar information were subsequently used. Light to heavy ratios (LHRs) of the AUC-values were calculated,  $\log_2$ -transformed, averaged for the transitions of each peptide and corrected for technical covariates. The peptide-level LHR information was averaged per protein and divided by the sex-specific standard deviation to yield relative protein levels. Panel 4 displays boxplots for the unadjusted relative concentrations of all investigated proteins, separately for incident type 2 diabetic cases (T2D) and non-cases (NC). Panel 5 illustrates the age- and sex-adjusted odds ratios for incident type 2 diabetes per 1 SD increased protein level. Statistically significant results in panels 5 and 6 ( $p < 0.05$ ) are displayed in bold. The multivariable adjusted panel 6 odds ratio figure is the same as shown in figure 2 of the main manuscript.
